# Supplementary material
Source: publisher figshare collection journal article supplement (https://sage.figshare.com/ndownloader/files/24067998)
Supplement: Supplementary file 1 [file 24067998]

# Supplemental figures legends

A, Normal thymus, CK18 negative control.

B, Normal thymus, CK14 negative control.

C, Normal thymus, CD20 negative control.

D, Hyperplastic lesion (LyR/MD areas), CK18 negative control.

E, Hyperplastic lesion (LyR/MD areas), CK14 negative control.

F, Hyperplastic lesion (LyR/MD areas), CD20 negative control.

G, Thymoma (LyR/MD areas), CK18 negative control.

H, Thymoma (LyR/MD areas), CK14 negative control.

I, Thymoma (LyR/MD areas), CD20 negative control.
